# Supplementary material
Source: MDPI journal article supplement (https://www.mdpi.com/2077-1312/11/7/1284)

Table SI. Temperature, salinity, density, and heat content trends for the áreas: Alboran, Cape Palos, Balearic Islands, and Northern Sector.

| Alborán. Temperature trends (°C/100 yr) |           |               |           |               |
|-----------------------------------------|-----------|---------------|-----------|---------------|
|                                         | 1900-2020 |               | 1945-2020 |               |
| 0-150                                   | -0.20     | [-0.51, 0.12] | -0.67     | [-1.49, 0.14] |
| 150-600                                 | 0.13      | [0.05, 0.20]  | 0.37      | [0.19, 0.55]  |
| 600 m-bottom                            | 0.15      | [0.11, 0.20]  | 0.34      | [0.27, 0.42]  |
| Total                                   | 0.31      | [0.01, 0.62]  | 0.42      | [0.00, 0.85]  |

| Alborán. Salinity trends (100 yr) <sup>-1</sup> |           |               |           |              |
|-------------------------------------------------|-----------|---------------|-----------|--------------|
|                                                 | 1900-2020 |               | 1945-2020 |              |
| 0-150                                           | 0.35      | [0.24, 0.46]  | 0.79      | [0.59, 0.99] |
| 150-600                                         | 0.08      | [0.04, 0.11]  | 0.23      | [0.17, 0.29] |
| 600 m-bottom                                    | 0.06      | [0.05, 0.07]  | 0.13      | [0.10, 0.15] |
| Total                                           | 0.06      | [-0.02, 0.14] | 0.33      | [0.22, 0.44] |

| Alborán. Density trends (kg m <sup>-3</sup> /100 yr) |           |               |           |               |
|------------------------------------------------------|-----------|---------------|-----------|---------------|
|                                                      | 1900-2020 |               | 1945-2020 |               |
| 0-150                                                | 0.29      | [0.16, 0.42]  | 0.73      | [0.49, 0.97]  |
| 150-600                                              | 0.01      | [-0.04, 0.05] | 0.03      | [-0.07, 0.12] |
| 600 m-bottom                                         | 0.02      | [0.01, 0.02]  | 0.04      | [0.02, 0.05]  |
| Total                                                | -0.07     | [-0.23, 0.09] | -0.09     | [-0.40, 0.21] |

| Alborán. Heat content trends (W/m <sup>2</sup> ) |           |               |           |               |
|--------------------------------------------------|-----------|---------------|-----------|---------------|
|                                                  | 1900-2020 |               | 1945-2020 |               |
| 0-150                                            | -0.02     | [-0.06, 0.02] | -0.08     | [-0.17, 0.02] |
| 150-600                                          | 0.05      | [0.01, 0.08]  | 0.13      | [0.07, 0.20]  |
| 600 m-bottom                                     | 0.06      | [0.03, 0.08]  | 0.14      | [0.10, 0.18]  |
| Total                                            | 0.07      | [0.00, 0.15]  | 0.19      | [0.05, 0.34]  |

| Cape Palos. Temperature trends (°C/100 yr) |           |               |           |               |
|--------------------------------------------|-----------|---------------|-----------|---------------|
|                                            | 1900-2020 |               | 1945-2020 |               |
| 0-150                                      | 0.34      | [-0.28, 0.95] | 0.86      | [-0.26, 1.97] |
| 150-600                                    | 0.05      | [-0.02, 0.13] | 0.22      | [0.06, 0.37]  |
| 600 m-bottom                               | 0.12      | [0.07, 0.16]  | 0.25      | [0.18, 0.33]  |
| Total                                      | 0.41      | [0.06, 0.76]  | 0.72      | [0.18, 1.27]  |

| Cape Palos. Salinity trends (100 yr) <sup>-1</sup> |           |               |           |               |
|----------------------------------------------------|-----------|---------------|-----------|---------------|
|                                                    | 1900-2020 |               | 1945-2020 |               |
| 0-150                                              | 0.09      | [0.00, 0.17]  | 0.17      | [0.00, 0.34]  |
| 150-600                                            | 0.05      | [0.02, 0.07]  | 0.13      | [0.08, 0.17]  |
| 600 m-bottom                                       | 0.05      | [0.04, 0.06]  | 0.11      | [0.09, 0.13]  |
| Total                                              | -0.01     | [-0.08, 0.07] | 0.04      | [-0.06, 0.15] |

| Cape Palos. Density trends (kg m <sup>-3</sup> /100 yr) |           |               |           |               |
|---------------------------------------------------------|-----------|---------------|-----------|---------------|
|                                                         | 1900-2020 |               | 1945-2020 |               |
| 0-150                                                   | -0.07     | [-0.29, 0.15] | -0.18     | [-0.59, 0.24] |
| 150-600                                                 | 0.01      | [-0.03, 0.04] | 0.02      | [-0.05, 0.09] |
| 600 m-bottom                                            | 0.01      | [0.01, 0.02]  | 0.03      | [0.02, 0.04]  |
| Total                                                   | -0.13     | [-0.28, 0.02] | -0.20     | [-0.45, 0.06] |

| Cape Palos. Heat content trends (W/m <sup>2</sup> ) |           |               |           |               |
|-----------------------------------------------------|-----------|---------------|-----------|---------------|
|                                                     | 1900-2020 |               | 1945-2020 |               |
| 0-150                                               | 0.02      | [-0.05, 0.10] | 0.09      | [-0.02, 0.19] |
| 150-600                                             | 0.02      | [-0.01, 0.06] | 0.11      | [0.04, 0.17]  |
| 600 m-bottom                                        | 0.16      | [0.06, 0.25]  | 0.36      | [0.20, 0.52]  |
| Total                                               | 0.21      | [0.07, 0.34]  | 0.54      | [0.27, 0.81]  |

| Balearic Islands. Temperature trends (°C/100 yr) |           |               |           |               |
|--------------------------------------------------|-----------|---------------|-----------|---------------|
|                                                  | 1900-2020 |               | 1945-2020 |               |
| 0-150                                            | 0.17      | [-0.26, 0.59] | 0.22      | [-0.69, 1.13] |
| 150-600                                          | 0.07      | [-0.02, 0.17] | 0.23      | [0.08, 0.39]  |
| 600 m-bottom                                     | 0.14      | [0.09, 0.18]  | 0.29      | [0.21, 0.37]  |
| Total                                            | 0.18      | [0.05, 0.32]  | 0.28      | [0.04, 0.52]  |

| Balearic Islands. Salinity trends (100 yr) <sup>-1</sup> |           |              |           |              |
|----------------------------------------------------------|-----------|--------------|-----------|--------------|
|                                                          | 1900-2020 |              | 1945-2020 |              |
| 0-150                                                    | 0.08      | [0.02, 0.14] | 0.22      | [0.09, 0.35] |
| 150-600                                                  | 0.03      | [0.01, 0.05] | 0.08      | [0.03, 0.13] |
| 600 m-bottom                                             | 0.05      | [0.04, 0.07] | 0.12      | [0.10, 0.13] |
| Total                                                    | 0.05      | [0.03, 0.07] | 0.12      | [0.10, 0.15] |

| Balearic Islands. Density trends (kg m <sup>-3</sup> /100 yr) |           |               |           |               |
|---------------------------------------------------------------|-----------|---------------|-----------|---------------|
|                                                               | 1900-2020 |               | 1945-2020 |               |
| 0-150                                                         | 0.01      | [-0.11, 0.13] | 0.12      | [-0.12, 0.36] |
| 150-600                                                       | 0.02      | [0.00, 0.03]  | 0.04      | [0.01, 0.07]  |
| 600 m-bottom                                                  | 0.01      | [0.01, 0.02]  | 0.03      | [0.02, 0.04]  |
| Total                                                         | -0.01     | [-0.05, 0.03] | 0.02      | [-0.06, 0.09] |

| Balearic Islands. Heat content trends (W/m <sup>2</sup> ) |           |               |           |               |
|-----------------------------------------------------------|-----------|---------------|-----------|---------------|
|                                                           | 1900-2020 |               | 1945-2020 |               |
| 0-150                                                     | 0.03      | [-0.03, 0.09] | 0.02      | [-0.13, 0.16] |
| 150-600                                                   | 0.03      | [-0.01, 0.07] | 0.09      | [0.02, 0.17]  |
| 600 m-bottom                                              | 0.16      | [0.09, 0.23]  | 0.36      | [0.26, 0.45]  |
| Total                                                     | 0.21      | [0.06, 0.36]  | 0.47      | [0.20, 0.73]  |

| Northern Sector. Temperature trends (°C/100 yr) |           |               |           |               |
|-------------------------------------------------|-----------|---------------|-----------|---------------|
|                                                 | 1900-2020 |               | 1945-2020 |               |
| 0-150                                           | 0.85      | [-0.02, 1.71] | 1.53      | [-0.30, 3.37] |
| 150-600                                         | 0.13      | [0.04, 0.22]  | 0.35      | [0.18, 0.51]  |
| 600 m-bottom                                    | 0.11      | [0.05, 0.17]  | 0.27      | [0.16, 0.39]  |
| Total                                           | 0.43      | [0.08, 0.78]  | 1.01      | [0.27, 1.75]  |

| Northern Sector. Salinity trends (100 yr) <sup>-1</sup> |           |               |           |               |
|---------------------------------------------------------|-----------|---------------|-----------|---------------|
|                                                         | 1900-2020 |               | 1945-2020 |               |
| 0-150                                                   | -0.01     | [-0.06, 0.03] | -0.03     | [-0.13, 0.06] |
| 150-600                                                 | 0.02      | [-0.02, 0.05] | 0.04      | [-0.03, 0.11] |
| 600 m-bottom                                            | 0.05      | [0.03, 0.07]  | 0.12      | [0.08, 0.15]  |
| Total                                                   | 0.03      | [0.00, 0.05]  | 0.07      | [0.02, 0.11]  |

| Northern Sector. Density trends (kg m <sup>-3</sup> /100 yr) |           |               |           |               |
|--------------------------------------------------------------|-----------|---------------|-----------|---------------|
|                                                              | 1900-2020 |               | 1945-2020 |               |
| 0-150                                                        | -0.22     | [-0.46, 0.02] | -0.46     | [-0.95, 0.04] |
| 150-600                                                      | -0.01     | [-0.02, 0.01] | -0.02     | [-0.05, 0.02] |
| 600 m-bottom                                                 | 0.01      | [0.01, 0.02]  | 0.03      | [0.02, 0.04]  |
| Total                                                        | -0.10     | [-0.21, 0.00] | -0.23     | [-0.47, 0.00] |

| Northern Sector. Heat content trends (W/m <sup>2</sup> ) |           |               |           |               |
|----------------------------------------------------------|-----------|---------------|-----------|---------------|
|                                                          | 1900-2020 |               | 1945-2020 |               |
| 0-150                                                    | 0.07      | [-0.03, 0.18] | 0.16      | [-0.06, 0.38] |
| 150-600                                                  | 0.06      | [0.01, 0.11]  | 0.16      | [0.08, 0.25]  |
| 600 m-bottom                                             | 0.15      | [0.02, 0.27]  | 0.36      | [0.12, 0.60]  |
| Total                                                    | 0.27      | [0.05, 0.50]  | 0.71      | [0.25, 1.16]  |

Figure S1. Monthly time series of sea level (black line) and reconstruction by linear forward step regression on atmospheric pressure, zonal and meridional components of the wind, and thermosteric and halosteric contrinbutions to sea level (red lines). Upper plot corresponds to L'Estartit where the linear model chose all the potential predictors. Lower plot corresponds to Alicante, where the linear model only selected the atmospheric variables as potential predictors and the thermosteric and halosteric contributions were not statistically correlated to sea level.

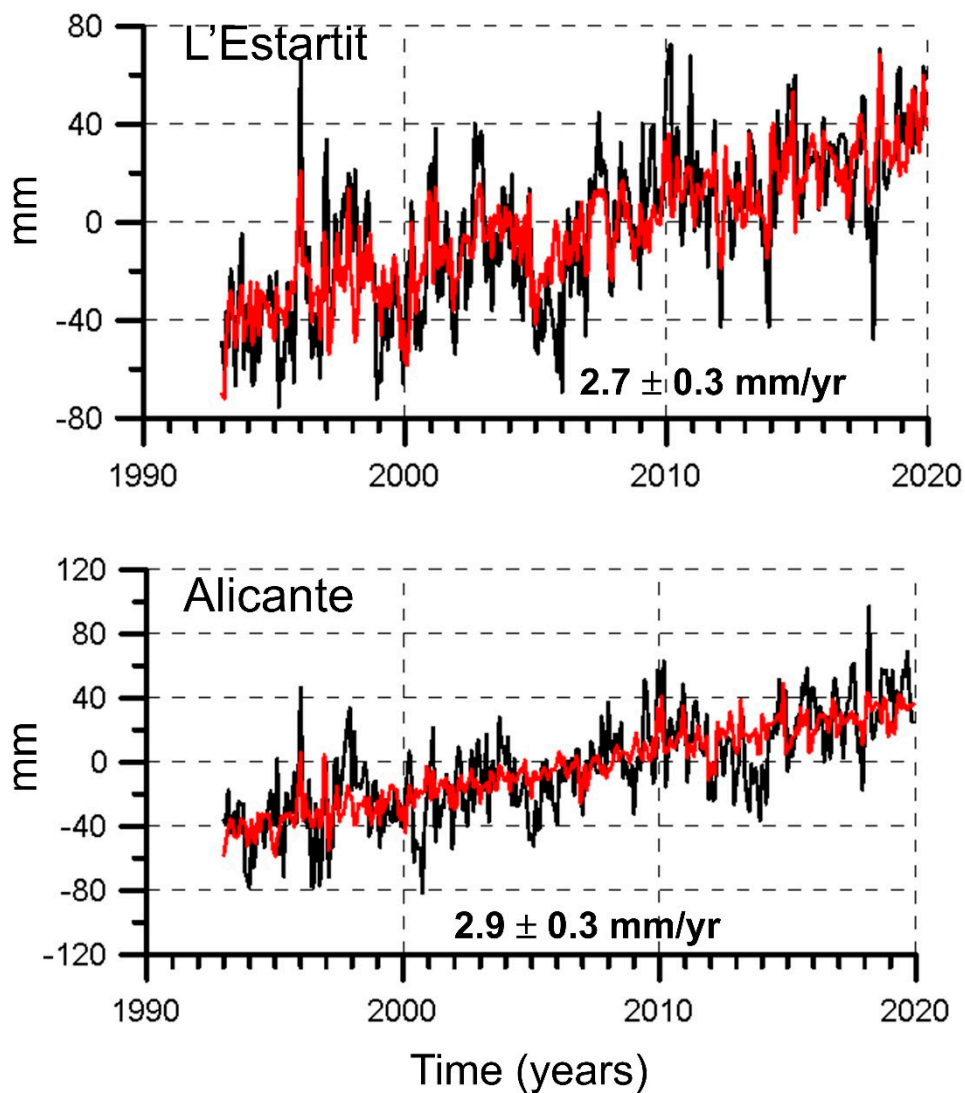

Supplement: s1 [file s1]
